# Supplementary material for: Uncovering novel genes for drought stress in rice at germination stage using genome wide association study
Source: Frontiers journal article supplement (doi:10.3389/fpls.2024.1421267), 2024-08-01
Supplement: Table_2.pdf [file Table_2.pdf]

# Identified genes in the four QTLs

| Number | Gene ID        | Annotation                                                                              |
|--------|----------------|-----------------------------------------------------------------------------------------|
| 1.     | LOC_Os03g14910 | expressed protein                                                                       |
| 2.     | LOC_Os03g14915 | expressed protein                                                                       |
| 3.     | LOC_Os03g14920 | expressed protein                                                                       |
| 4.     | LOC_Os03g14930 | retrotransposon protein, putative, unclassified, expressed                              |
| 5.     | LOC_Os03g14940 | retrotransposon protein, putative, unclassified                                         |
| 6.     | LOC_Os03g14950 | <i>OspPLAIII<math>\alpha</math></i>                                                     |
| 7.     | LOC_Os03g14980 | <i>OsTPR3</i> ; <i>ASPR1</i>                                                            |
| 8.     | LOC_Os03g14990 | chorismate synthase 2, chloroplast precursor, putative, expressed                       |
| 9.     | LOC_Os03g15000 | Zinc finger, C3HC4 type domain containing protein, expressed                            |
| 10.    | LOC_Os03g15010 | transposon protein, putative, unclassified, expressed                                   |
| 11.    | LOC_Os03g15020 | beta-galactosidase precursor, putative, expressed                                       |
| 12.    | LOC_Os03g15033 | expressed protein                                                                       |
| 13.    | LOC_Os03g15040 | FAR1 family protein, expressed                                                          |
| 14.    | LOC_Os03g15050 | phosphoenolpyruvate carboxykinase, putative, expressed                                  |
| 15.    | LOC_Os03g15070 | expressed protein                                                                       |
| 16.    | LOC_Os03g15080 | expressed protein                                                                       |
| 17.    | LOC_Os03g15090 | expressed protein                                                                       |
| 18.    | LOC_Os03g15100 | expressed protein                                                                       |
| 19.    | LOC_Os03g15110 | expressed protein                                                                       |
| 20.    | LOC_Os03g15120 | imidazole glycerol phosphate synthase hisHF, chloroplast precursor, putative, expressed |
| 21.    | LOC_Os03g15130 | expressed protein                                                                       |
| 22.    | LOC_Os03g15140 | retrotransposon protein, putative, unclassified, expressed                              |
| 23.    | LOC_Os03g15150 | retrotransposon protein, putative, unclassified                                         |
| 24.    | LOC_Os03g15160 | retrotransposon protein, putative, Ty3-gypsy subclass, expressed                        |
| 25.    | LOC_Os03g15170 | retrotransposon protein, putative, unclassified, expressed                              |
| 26.    | LOC_Os03g15180 | PH domain containing protein, expressed                                                 |
| 27.    | LOC_Os03g15190 | expressed protein                                                                       |
| 28.    | LOC_Os03g15200 | expressed protein                                                                       |
| 29.    | LOC_Os03g15210 | DUF292 domain containing protein, expressed                                             |
| 30.    | LOC_Os03g15230 | DUF292 domain containing protein, expressed                                             |
| 31.    | LOC_Os03g15240 | expressed protein                                                                       |
| 32.    | LOC_Os03g15250 | lectin-like receptor kinase, putative, expressed                                        |
| 33.    | LOC_Os03g15260 | expressed protein                                                                       |
| 34.    | LOC_Os03g15270 | gibberellin receptor GID1L2, putative, expressed                                        |
| 35.    | LOC_Os03g15280 | hypothetical protein                                                                    |
| 36.    | LOC_Os03g15290 | beclin-1, putative, expressed                                                           |
| 37.    | LOC_Os03g15300 | hypothetical protein                                                                    |
| 38.    | LOC_Os03g15310 | transposon protein, putative, unclassified                                              |
| 39.    | LOC_Os03g15320 | glyoxal oxidase-related, putative, expressed                                            |
| 40.    | LOC_Os03g15330 | expressed protein                                                                       |
| 41.    | LOC_Os03g15340 | plastocyanin-like domain containing protein, putative, expressed                        |

|     |                |                                                                                                                       |
|-----|----------------|-----------------------------------------------------------------------------------------------------------------------|
| 42. | LOC_Os03g15350 | <i>OsHrd3</i>                                                                                                         |
| 43. | LOC_Os03g15360 | nmrA-like family domain containing protein, expressed                                                                 |
| 44. | LOC_Os03g15370 | <i>Ubl402</i>                                                                                                         |
| 45. | LOC_Os03g15380 | expressed protein                                                                                                     |
| 46. | LOC_Os03g15390 | GA17271-PA, putative, expressed                                                                                       |
| 47. | LOC_Os03g15400 | retrotransposon protein, putative, unclassified, expressed                                                            |
| 48. | LOC_Os03g15410 | expressed protein                                                                                                     |
| 49. | LOC_Os03g15420 | dynamain family protein, putative, expressed                                                                          |
| 50. | LOC_Os03g15430 | Ser/Thr protein phosphatase family protein, putative, expressed                                                       |
| 51. | LOC_Os03g15440 | basic helix-loop-helix, putative, expressed                                                                           |
| 52. | LOC_Os03g15450 | retrotransposon protein, putative, Ty3-gypsy subclass, expressed                                                      |
| 53. | LOC_Os03g15460 | expressed protein                                                                                                     |
| 54. | LOC_Os03g15470 | expressed protein                                                                                                     |
| 55. | LOC_Os03g15480 | heat shock protein DnaJ, putative, expressed                                                                          |
| 56. | LOC_Os03g15490 | hypothetical protein                                                                                                  |
| 57. | LOC_Os03g15500 | retrotransposon protein, putative, unclassified                                                                       |
| 58. | LOC_Os03g15510 | transposon protein, putative, unclassified, expressed                                                                 |
| 59. | LOC_Os03g15520 | transposon protein, putative, unclassified, expressed                                                                 |
| 60. | LOC_Os03g15530 | expressed protein                                                                                                     |
| 61. | LOC_Os03g15540 | HEAT repeat family protein, putative, expressed                                                                       |
| 62. | LOC_Os03g15560 | wibg, putative, expressed                                                                                             |
| 63. | LOC_Os03g15570 | STE_MEKK_stell1_MAP3K.12 - STE kinases include homologs to sterile 7, sterile 11 and sterile 20 from yeast, expressed |
| 64. | LOC_Os03g15580 | AT hook motif family protein, expressed                                                                               |
| 65. | LOC_Os03g15590 | eukaryotic translation initiation factor, putative, expressed                                                         |
| 66. | LOC_Os03g15600 | expressed protein                                                                                                     |
| 67. | LOC_Os03g15610 | retrotransposon protein, putative, unclassified, expressed                                                            |
| 68. | LOC_Os03g15620 | retrotransposon protein, putative, unclassified, expressed                                                            |
| 69. | LOC_Os03g15630 | harpin-induced protein 1 domain containing protein, expressed                                                         |
| 70. | LOC_Os03g15650 | <i>GLUP6; GEF</i>                                                                                                     |
| 71. | LOC_Os03g15660 | AP2 domain containing protein, expressed                                                                              |
| 72. | LOC_Os03g15670 | hypothetical protein                                                                                                  |
| 73. | LOC_Os03g15680 | nodulation-signaling pathway 2 protein, putative, expressed                                                           |
| 74. | LOC_Os03g15690 | phosphate carrier protein, mitochondrial precursor, putative, expressed                                               |
| 75. | LOC_Os03g15700 | splicing factor 3A subunit 2, putative, expressed                                                                     |
| 76. | LOC_Os03g15710 | <i>OsSTRL2</i>                                                                                                        |
| 77. | LOC_Os03g15720 | expressed protein                                                                                                     |
| 78. | LOC_Os03g15730 | S-RNase-binding protein, putative, expressed                                                                          |
| 79. | LOC_Os03g15740 | uncharacterized TPR repeat-containing protein, putative, expressed                                                    |
| 80. | LOC_Os03g15750 | ASC1, putative, expressed                                                                                             |
| 81. | LOC_Os03g15760 | expressed protein                                                                                                     |
| 82. | LOC_Os03g15770 | tyrosine protein kinase domain containing protein, putative, expressed                                                |
| 83. | LOC_Os03g15780 | <i>OASA2</i>                                                                                                          |

|      |                |                                                                                                            |
|------|----------------|------------------------------------------------------------------------------------------------------------|
| 84.  | LOC_Os03g15790 | ZOS3-08 - C2H2 zinc finger protein, expressed                                                              |
| 85.  | LOC_Os03g15800 | B4-BTB2 - Bric-a-Brac, Tramtrack, Broad Complex BTB domain with B4 subfamily conserved sequence, expressed |
| 86.  | LOC_Os03g15810 | AAA-type ATPase family protein, putative, expressed                                                        |
| 87.  | LOC_Os03g15820 | expressed protein                                                                                          |
| 88.  | LOC_Os03g15830 | transposon protein, putative, unclassified, expressed                                                      |
| 89.  | LOC_Os03g15840 | <i>pls2</i>                                                                                                |
| 90.  | LOC_Os03g15850 | josephin, putative, expressed                                                                              |
| 91.  | LOC_Os03g15860 | mitochondrial carrier protein, putative, expressed                                                         |
| 92.  | LOC_Os03g15870 | ribosomal protein L4, putative, expressed                                                                  |
| 93.  | LOC_Os03g15880 | <i>OsCOI2</i>                                                                                              |
| 94.  | LOC_Os03g15890 | RNA recognition motif containing protein, expressed                                                        |
| 95.  | LOC_Os03g15900 | SH3 domain containing protein, expressed                                                                   |
| 96.  | LOC_Os03g15910 | membrane protein, putative, expressed                                                                      |
| 97.  | LOC_Os03g15920 | expressed protein                                                                                          |
| 98.  | LOC_Os03g15930 | OTU-like cysteine protease family protein, putative, expressed                                             |
| 99.  | LOC_Os03g15940 | OsWLIM2 - LIM domain protein, putative actin-binding protein and transcription factor, expressed           |
| 100. | LOC_Os03g15950 | enolase, putative, expressed                                                                               |
| 101. | LOC_Os03g15960 | <i>OsHsp17.9A</i> , affects seed germination                                                               |
| 102. | LOC_Os03g15970 | transposon protein, putative, Mariner sub-class, expressed                                                 |
| 103. | LOC_Os03g15990 | EDM2, putative, expressed                                                                                  |
| 104. | LOC_Os03g16000 | src homology-3 domain protein 3, putative, expressed                                                       |
| 105. | LOC_Os03g16010 | BRASSINOSTEROID INSENSITIVE 1-associated receptor kinase 1 precursor, putative, expressed                  |
| 106. | LOC_Os03g16020 | <i>OsHsp17.4</i> , affects seed germination and seedlings                                                  |
| 107. | LOC_Os03g16030 | <i>OsHSP18.0-CI</i> ; <i>OsMSR3</i>                                                                        |
| 108. | LOC_Os03g16040 | <i>OsHSP17.7</i> , drought tolerance                                                                       |
| 109. | LOC_Os03g16050 | fructose-1,6-bisphosphatase, putative, expressed                                                           |
| 110. | LOC_Os03g16060 | expressed protein                                                                                          |
| 111. | LOC_Os03g16070 | expressed protein                                                                                          |
| 112. | LOC_Os03g16080 | mitochondrial carrier protein, putative, expressed                                                         |
| 113. | LOC_Os03g16090 | <i>HDR3</i>                                                                                                |
| 114. | LOC_Os03g16110 | <i>OsPP1a</i>                                                                                              |
| 115. | LOC_Os03g16120 | myosin heavy chain-related, putative, expressed                                                            |
| 116. | LOC_Os03g16130 | CAMK_CAMK_like_ULKh_APgy.2 - CAMK includes calcium/calmodulin dependent protein kinases, expressed         |
| 117. | LOC_Os03g16140 | digalactosyldiacylglycerol synthase, chloroplast precursor, putative, expressed                            |
| 118. | LOC_Os03g16150 | <i>OsVTC1-3</i> ; <i>OsMPG3</i>                                                                            |
| 119. | LOC_Os03g16160 | hypothetical protein                                                                                       |
| 120. | LOC_Os03g16170 | <i>OsPP2C30</i> ; <i>OsPP48</i> , drought tolerance                                                        |
| 121. | LOC_Os03g16200 | hypothetical protein                                                                                       |
| 122. | LOC_Os03g16210 | tropinone reductase, putative, expressed                                                                   |
| 123. | LOC_Os03g16220 | oxidoreductase, short chain dehydrogenase/reductase family domain containing protein, expressed            |
| 124. | LOC_Os03g16230 | oxidoreductase, short chain dehydrogenase/reductase family protein, putative, expressed                    |
| 125. | LOC_Os03g16250 | retrotransposon protein, putative, unclassified                                                            |

|      |                |                                                                          |
|------|----------------|--------------------------------------------------------------------------|
| 126. | LOC_Os03g16260 | protein kinase, putative, expressed                                      |
| 127. | LOC_Os03g16270 | expressed protein                                                        |
| 128. | LOC_Os03g16280 | retrotransposon protein, putative, unclassified, expressed               |
| 129. | LOC_Os03g16290 | fringe-related protein, putative, expressed                              |
| 130. | LOC_Os03g16300 | transposon protein, putative, unclassified, expressed                    |
| 131. | LOC_Os03g16310 | retrotransposon protein, putative, LINE subclass, expressed              |
| 132. | LOC_Os03g16320 | expressed protein                                                        |
| 133. | LOC_Os03g16334 | fringe-related protein, putative, expressed                              |
| 134. | LOC_Os03g16350 | DNA binding protein, putative, expressed                                 |
| 135. | LOC_Os03g16369 | retrotransposon protein, putative, unclassified, expressed               |
| 136. | LOC_Os03g16390 | avr9/Cf-9 rapidly elicited protein, putative, expressed                  |
| 137. | LOC_Os03g16400 | expressed protein                                                        |
| 138. | LOC_Os03g16410 | expressed protein                                                        |
| 139. | LOC_Os03g16420 | retrotransposon protein, putative, unclassified, expressed               |
| 140. | LOC_Os03g16430 | RNA polymerase sigma factor, putative, expressed                         |
| 141. | LOC_Os03g16440 | outer membrane protein, OMP85 family, putative, expressed                |
| 142. | LOC_Os03g16450 | pentatricopeptide, putative, expressed                                   |
| 143. | LOC_Os03g16460 | expressed protein                                                        |
| 144. | LOC_Os03g16470 | expressed protein                                                        |
| 145. | LOC_Os03g16480 | zinc finger family protein, putative, expressed                          |
| 146. | LOC_Os03g16490 | hypothetical protein                                                     |
| 147. | LOC_Os03g16500 | aspartic proteinase nepenthesin precursor, putative, expressed           |
| 148. | LOC_Os03g16530 | retrotransposon protein, putative, unclassified, expressed               |
| 149. | LOC_Os03g16540 | transposon protein, putative, unclassified, expressed                    |
| 150. | LOC_Os03g16550 | expressed protein                                                        |
| 151. | LOC_Os03g16560 | expressed protein                                                        |
| 152. | LOC_Os03g16570 | <i>OsSDIR1</i> , drought tolerance                                       |
| 153. | LOC_Os03g16580 | expressed protein                                                        |
| 154. | LOC_Os03g16600 | expressed protein                                                        |
| 155. | LOC_Os03g16610 | laccase precursor protein, putative, expressed                           |
| 156. | LOC_Os03g16620 | transposon protein, putative, unclassified, expressed                    |
| 157. | LOC_Os03g16630 | retrotransposon protein, putative, Ty1-copia subclass, expressed         |
| 158. | LOC_Os03g16640 | retrotransposon protein, putative, Ty3-gypsy subclass                    |
| 159. | LOC_Os03g16650 | retrotransposon protein, putative, Ty1-copia subclass                    |
| 160. | LOC_Os03g16660 | expressed protein                                                        |
| 161. | LOC_Os03g16670 | haloacid dehalogenase-like hydrolase family protein, putative, expressed |
| 162. | LOC_Os03g16680 | hypothetical protein                                                     |
| 163. | LOC_Os03g16690 | oxysterol-binding protein, putative, expressed                           |
| 164. | LOC_Os03g16700 | initiator-binding protein, putative, expressed                           |
| 165. | LOC_Os03g16709 | expressed protein                                                        |
| 166. | LOC_Os03g16718 | expressed protein                                                        |
| 167. | LOC_Os03g16730 | expressed protein                                                        |
| 168. | LOC_Os03g16740 | <i>OsRLCK107</i>                                                         |
| 169. | LOC_Os03g16750 | retrotransposon protein, putative, Ty3-gypsy subclass, expressed         |
| 170. | LOC_Os03g16760 | protein phosphatase 2C, putative, expressed                              |

|      |                |                                                                                 |
|------|----------------|---------------------------------------------------------------------------------|
| 171. | LOC_Os03g16770 | hypothetical protein                                                            |
| 172. | LOC_Os03g16780 | ankyrin repeat family protein, putative, expressed                              |
| 173. | LOC_Os03g16790 | DHHC zinc finger domain containing protein, expressed                           |
| 174. | LOC_Os03g16800 | clathrin assembly protein, putative, expressed                                  |
| 175. | LOC_Os03g16824 | spotted leaf 11, putative, expressed                                            |
| 176. | LOC_Os03g16840 | expressed protein                                                               |
| 177. | LOC_Os03g16850 | <i>OsDof-14; OsDof12</i>                                                        |
| 178. | LOC_Os03g16860 | <i>OsHSP71.1, drought tolerance</i>                                             |
| 179. | LOC_Os03g16870 | expressed protein                                                               |
| 180. | LOC_Os03g16874 | expressed protein                                                               |
| 181. | LOC_Os03g16880 | DnaK family protein, putative, expressed                                        |
| 182. | LOC_Os03g16890 | N-acetylglucosaminyltransferase, putative, expressed                            |
| 183. | LOC_Os03g16900 | <i>OsGDI3</i>                                                                   |
| 184. | LOC_Os03g16910 | SLT1 protein, putative, expressed                                               |
| 185. | LOC_Os03g16920 | DnaK family protein, putative, expressed                                        |
| 186. | LOC_Os03g16940 | <i>OsGLY13, seed salt stress tolerance</i>                                      |
| 187. | LOC_Os03g16950 | cysteine-rich repeat secretory protein 55 precursor, putative, expressed        |
| 188. | LOC_Os03g16970 | expressed protein                                                               |
| 189. | LOC_Os03g16980 | <i>BC25; OsUXS3</i>                                                             |
| 190. | LOC_Os03g16990 | expressed protein                                                               |
| 191. | LOC_Os03g17000 | NAD dependent epimerase/dehydratase family domain containing protein, expressed |
| 192. | LOC_Os03g17010 | RNA recognition motif containing protein, putative, expressed                   |
| 193. | LOC_Os03g17020 | GTPase-activating protein, putative, expressed                                  |
| 194. | LOC_Os03g17030 | polyadenylate-binding protein, putative, expressed                              |
| 195. | LOC_Os03g17040 | expressed protein                                                               |
| 196. | LOC_Os03g17050 | expressed protein                                                               |
| 197. | LOC_Os03g17060 | RNA recognition motif containing protein, putative, expressed                   |
| 198. | LOC_Os03g17070 | ATP synthase B chain, chloroplast precursor, putative, expressed                |
| 199. | LOC_Os03g17084 | Core histone H2A/H2B/H3/H4 domain containing protein, putative, expressed       |
| 200. | LOC_Os03g17100 | Core histone H2A/H2B/H3/H4 domain containing protein, putative, expressed       |
| 201. | LOC_Os03g17110 | transposon protein, putative, CACTA, En/Spm sub-class, expressed                |
| 202. | LOC_Os03g17120 | arginine biosynthesis bifunctional protein argJ 1, putative, expressed          |
| 203. | LOC_Os03g17130 | bHelix-loop-helix transcription factor, putative, expressed                     |
| 204. | LOC_Os03g17140 | expressed protein                                                               |
| 205. | LOC_Os03g17150 | ZOS3-09 - C2H2 zinc finger protein, expressed                                   |
| 206. | LOC_Os03g17164 | kinesin-related protein, putative, expressed                                    |
| 207. | LOC_Os03g17170 | zinc finger, C3HC4 type domain containing protein, expressed                    |
| 208. | LOC_Os03g17174 | PsbP, putative, expressed                                                       |
| 209. | LOC_Os03g17180 | ABC transporter, ATP-binding protein, putative, expressed                       |
| 210. | LOC_Os03g17200 | plant-specific domain TIGR01589 family protein, expressed                       |
| 211. | LOC_Os03g17210 | expressed protein                                                               |
| 212. | LOC_Os03g17220 | dirigent, putative, expressed                                                   |

|      |                |                                                                                               |
|------|----------------|-----------------------------------------------------------------------------------------------|
| 213. | LOC_Os03g17230 | <i>OsUXS2</i>                                                                                 |
| 214. | LOC_Os03g17240 | ankyrin repeat-containing protein, putative, expressed                                        |
| 215. | LOC_Os03g17250 | ankyrin repeat-containing protein, putative, expressed                                        |
| 216. | LOC_Os03g17260 | expressed protein                                                                             |
| 217. | LOC_Os03g17270 | expressed protein                                                                             |
| 218. | LOC_Os03g17280 | expressed protein                                                                             |
| 219. | LOC_Os03g17300 | TKL_IRAK_CrRLK1L-1.7 - The CrRLK1L-1 subfamily has homology to the CrRLK1L homolog, expressed |
| 220. | LOC_Os03g17310 | calcium-transporting ATPase, endoplasmic reticulum-type, putative, expressed                  |
| 221. | LOC_Os07g48070 | conserved hypothetical protein                                                                |
| 222. | LOC_Os07g48080 | expressed protein                                                                             |
| 223. | LOC_Os07g48100 | <i>OsCIPK2</i>                                                                                |
| 224. | LOC_Os07g48110 | expressed protein                                                                             |
| 225. | LOC_Os07g48120 | expressed protein                                                                             |
| 226. | LOC_Os07g48130 | <i>OsHAK9</i>                                                                                 |
| 227. | LOC_Os07g48140 | ATOF17/OFP17, putative, expressed                                                             |
| 228. | LOC_Os07g48150 | DUF623 domain containing protein, expressed                                                   |
| 229. | LOC_Os07g48160 | alpha-galactosidase precursor, putative, expressed                                            |
| 230. | LOC_Os07g48170 | nucleotidyltransferase, putative, expressed                                                   |
| 231. | LOC_Os07g48180 | <i>OsZIP61</i>                                                                                |
| 232. | LOC_Os07g48190 | expressed protein                                                                             |
| 233. | LOC_Os07g48200 | B3 DNA binding domain containing protein, putative, expressed                                 |
| 234. | LOC_Os07g48210 | retrotransposon protein, putative, unclassified                                               |
| 235. | LOC_Os07g48229 | vacuolar-sorting receptor precursor, putative, expressed                                      |
| 236. | LOC_Os07g48244 | ubiquinol-cytochrome c reductase complex 6.7 kDa protein, putative, expressed                 |
| 237. | LOC_Os07g48260 | <i>OsWRKY47 (draught stress)</i>                                                              |
| 238. | LOC_Os07g48270 | <i>CHR739</i>                                                                                 |
| 239. | LOC_Os07g48280 | expressed protein                                                                             |
| 240. | LOC_Os07g48290 | AGC-AGC-other_RS6K_like.2 - ACG kinases include homologs to PKA, PKG and PKC, expressed       |
| 241. | LOC_Os07g48300 | eukaryotic translation initiation factor 2 subunit beta, putative, expressed                  |
| 242. | LOC_Os07g48310 | inactive receptor kinase At2g26730 precursor, putative, expressed                             |
| 243. | LOC_Os07g48320 | HAD superfamily phosphatase, putative, expressed                                              |
| 244. | LOC_Os07g48330 | <i>CYP714B1</i>                                                                               |
| 245. | LOC_Os07g48340 | <i>OsCML24</i>                                                                                |
| 246. | LOC_Os05g41280 | <i>OsZIP43</i>                                                                                |
| 247. | LOC_Os05g41290 | disease resistance RPP13-like protein 1, putative, expressed                                  |
| 248. | LOC_Os05g41300 | expressed protein                                                                             |
| 249. | LOC_Os05g41310 | disease resistance protein RGA2, putative, expressed                                          |
| 250. | LOC_Os07g48140 | ATOF17/OFP17, putative, expressed                                                             |
| 251. | LOC_Os07g48200 | B3 DNA binding domain containing protein, putative, expressed                                 |
| 252. | LOC_Os07g48229 | Vacuolar-sorting receptor precursor, putative, expressed                                      |

|      |                |                                                                                       |
|------|----------------|---------------------------------------------------------------------------------------|
| 253. | LOC_Os07g48300 | Eukaryotic translation initiation factor 2 subunit beta, putative, expressed          |
| 254. | LOC_Os07g48320 | HAD superfamily phosphatase, putative, expressed                                      |
| 255. | LOC_Os05g03810 | Trehalose phosphatase, putative, expressed                                            |
| 256. | LOC_Os05g03840 | Endoglucanase, putative, expressed                                                    |
| 257. | LOC_Os05g03910 | RNA polymerase II-associated protein 3, putative, expressed                           |
| 258. | LOC_Os05g03920 | TKL_IRAK_DUF26-lf.3 - DUF26 kinases have homology to DUF26 containing loci, expressed |
| 259. | LOC_Os05g04020 | Plant protein of unknown function domain containing protein, expressed                |
| 260. | LOC_Os05g04120 | Ferroportin1 domain containing protein, expressed                                     |
| 261. | LOC_Os05g04160 | Pentatricopeptide containing protein, putative, expressed                             |
| 262. | LOC_Os05g04170 | AMP-binding enzyme, putative, expressed                                               |
| 263. | LOC_Os05g04210 | MYB family transcription factor, putative, expressed                                  |
